# Supplementary material for: Guideline‐Directed Medical Therapy for Patients With Heart Failure With Midrange Ejection Fraction: A Patient‐Pooled Analysis From the KorHF and KorAHF Registries
Source: PubMed Central journal article supplement — J Am Heart Assoc. 2018 Oct 25;7(21):e009806. doi: 10.1161/JAHA.118.009806 (PMC6404181; doi:10.1161/jaha.118.009806), 2018-10-25
Supplement: JAH3-7-e009806-s001.pdf [file JAH3-7-e009806-s001.pdf]

# **Supplemental Material**

**Table S1. Standardized differences of variables used in PS matching and IPW adjustment to adjust for baseline differences.**

|                                      | Beta-blocker at discharge        |            |              | Renin angiotensin system blocker at discharge |            |              | Aldosterone antagonist at discharge |            |              |
|--------------------------------------|----------------------------------|------------|--------------|-----------------------------------------------|------------|--------------|-------------------------------------|------------|--------------|
|                                      | Standardized mean differences, % |            |              | Standardized mean differences, %              |            |              | Standardized mean differences, %    |            |              |
|                                      | Unadjusted                       | PS matched | IPW-adjusted | Unadjusted                                    | PS matched | IPW-adjusted | Unadjusted                          | PS matched | IPW-adjusted |
| Age (yr)                             | 8.7                              | 6.0        | 0.1          | -6.6                                          | -1.8       | -3.9         | 1.2                                 | -1.2       | -1.6         |
| Male                                 | 0.5                              | -3.7       | -2.2         | -0.9                                          | -0.7       | -2.2         | -20.8                               | 1.1        | -2.9         |
| Body mass index (kg/m <sup>2</sup> ) | -13.8                            | -2.2       | 2.8          | -20.2                                         | -4.3       | -2.3         | -4.0                                | -0.9       | 4.4          |
| Current smoker                       | -10.6                            | -4.0       | -0.2         | 9.9                                           | -4.4       | -1.9         | -7.8                                | -0.8       | 1.8          |
| Hypertension                         | -16.6                            | -4.3       | 0.7          | -23.1                                         | -4.0       | -2.7         | -11.0                               | -1.7       | -5.1         |
| Diabetes mellitus                    | -13.3                            | 3.4        | 0.4          | -7.9                                          | -3.5       | -1.9         | -14.0                               | -4.7       | 0.8          |
| Chronic kidney disease               | -6.1                             | 0.8        | 1.3          | 12.1                                          | 0.9        | -3.0         | -48.3                               | -3.1       | -1.1         |
| Previous myocardial infarction       | -13.2                            | 0.8        | 2.1          | -10.2                                         | -4.7       | -3.5         | -15.6                               | -2.4       | -3.3         |
| Previous cerebrovascular accident    | -12.4                            | 0          | -0.8         | -10.5                                         | -8.0       | 0.2          | -4.4                                | -0.8       | -1.3         |
| Previous heart failure admission     | 11.3                             | 1.2        | -0.2         | -13.3                                         | -1.6       | 0.2          | 14.4                                | 3.1        | -0.7         |
| De novo acute heart failure          | 10.3                             | 2.7        | 1.0          | 4.1                                           | -3.3       | -1.4         | 13.1                                | 3.9        | -0.6         |
| NYHA                                 | -13.0                            | 6.3        | 0.9          | -9.9                                          | 1.6        | -1.7         | 19.6                                | 1.1        | 1.8          |
| Ischemic cardiomyopathy              | -34.8                            | -7.2       | 0.5          | -8.3                                          | -2.0       | -4.3         | -32.7                               | -7.4       | 0.2          |
| Dilated cardiomyopathy               | 3.8                              | -2.6       | -2.1         | -2.6                                          | -1.7       | 3.3          | 15.9                                | 9.0        | 0.4          |
| Valvular heart disease               | 23.5                             | 4.0        | 0.3          | 14.2                                          | 4.3        | 2.9          | 6.6                                 | -5.3       | 1.2          |

|                                        |       |      |      |       |      |      |       |      |      |
|----------------------------------------|-------|------|------|-------|------|------|-------|------|------|
| Atrial fibrillation                    | 19.0  | 0.6  | -0.3 | 5.8   | 0.7  | 0.3  | 12.9  | -0.6 | 2.1  |
| Systolic blood pressure (mmHg)         | -4.9  | -0.6 | -0.4 | -33.5 | 1.6  | -2.6 | -9.3  | -2.5 | -2.6 |
| Left ventricular ejection fraction (%) | -1.1  | 0.6  | -2.0 | -5.5  | -5.7 | -5.4 | 4.4   | -1.3 | 4.3  |
| WBC (/mm <sup>3</sup> )                | -20.9 | 1.1  | 0.8  | 10.4  | 2.7  | -0.4 | -21.9 | -1.2 | -2.8 |
| Creatinine (mg/dL)                     | -7.2  | 0.6  | 0.8  | 6.2   | 0.9  | -4.8 | -76.9 | -8.2 | 1.8  |
| Hemoglobin (g/dL)                      | -1.9  | -6.2 | -1.3 | 0.2   | 2.4  | 3.0  | 9.2   | 4.2  | -5.7 |
| IV diuretic                            | 0.8   | 0    | 2.1  | -4.9  | 5.8  | 0.9  | 30.1  | -6.9 | 2.2  |
| IV inotrope                            | 15.5  | 5.4  | 0.8  | 46.3  | 6.1  | -0.6 | -14.8 | -4.8 | 0.3  |
| Mechanical ventilation                 | 4.1   | 1.6  | -0.7 | 17.5  | 3.6  | -1.5 | -5.5  | 0.9  | -0.4 |
| Transfusion                            | 7.2   | 5.3  | 1.6  | 22.7  | 0.8  | -2.2 | -10.2 | -1.5 | 1.1  |
| ICU admission                          | -10.1 | 3.2  | 1.9  | 16.0  | 2.0  | -2.5 | -17.0 | -8.9 | 2.2  |
| Beta-blocker                           | NA    | NA   | NA   | -47.1 | -4.7 | 1.0  | 8.1   | 1.7  | 1.0  |
| Renin angiotensin system blocker       | -42.5 | -6.4 | -0.2 | NA    | NA   | NA   | 13.1  | 4.2  | 0.3  |
| Aldosterone antagonist                 | -10.1 | -4.4 | -0.7 | -13.4 | -4.9 | 2.7  | NA    | NA   | NA   |

---

ICU = intensive care unit; IPW = inverse probability weighted; IV = intra-venous; NYHA = New York Heart Association; PS = propensity score; WBC = white blood cell

**Table S2. Comparison of KorHF and KorAHF populations.**

| Variables                                         | KorHF (N=301) | KorAHF (N=843) | P value |
|---------------------------------------------------|---------------|----------------|---------|
| <i>Demographics</i>                               |               |                |         |
| Age (yr)                                          | 69.8 ± 14.5   | 71.0 ± 12.9    | 0.233   |
| Male                                              | 135 (44.9%)   | 397 (47.1%)    | 0.547   |
| Body mass index (kg/m <sup>2</sup> )              | 22.9±3.6      | 23.4±3.7       | 0.051   |
| <i>Cardiovascular risk factors</i>                |               |                |         |
| Current smoker                                    | 56 (18.6%)    | 111 (13.2%)    | 0.028   |
| Hypertension                                      | 154 (51.2%)   | 538 (63.8%)    | <0.001  |
| Diabetes mellitus                                 | 100 (33.2%)   | 302 (35.8%)    | 0.458   |
| Chronic kidney disease                            | 34 (11.3%)    | 133 (15.8%)    | 0.073   |
| Previous myocardial infarction                    | 45 (15.0%)    | 145 (17.2%)    | 0.418   |
| Previous cerebrovascular accident                 | 30 (10.0%)    | 133 (15.8%)    | 0.017   |
| Previous heart failure admission                  | 6 (2.0%)      | 242 (28.7%)    | <0.001  |
| <i>Presentation and etiology of heart failure</i> |               |                |         |
| De novo acute heart failure                       | 87 (28.9%)    | 370 (43.9%)    | <0.001  |
| NYHA ≥3                                           | 196 (65.1%)   | 705 (83.6%)    | <0.001  |
| Ischemic cardiomyopathy                           | 170 (56.5%)   | 374 (44.4%)    | <0.001  |
| Dilated cardiomyopathy                            | 21 (7.0%)     | 33 (3.9%)      | 0.046   |
| Valvular heart disease                            | 40 (13.3%)    | 122 (14.5%)    | 0.682   |

|                                            |                |                |        |
|--------------------------------------------|----------------|----------------|--------|
| Arrhythmia                                 | 39 (13.0%)     | 294 (34.9%)    | <0.001 |
| Atrial fibrillation                        | 32 (10.6%)     | 263 (31.2%)    | <0.001 |
| <i>Hemodynamic parameters at admission</i> |                |                |        |
| Systolic blood pressure (mmHg)             | 134.8±32.1     | 137.7±31.9     | 0.180  |
| Diastolic blood pressure (mmHg)            | 80.1±18.0      | 79.8±19.5      | 0.784  |
| Pulse rate (beats/min)                     | 91.2±28.0      | 92.3±26.6      | 0.527  |
| Left ventricular ejection fraction (%)     | 44.1±2.9       | 44.2±2.8       | 0.359  |
| <i>Laboratory data</i>                     |                |                |        |
| WBC (/mm <sup>3</sup> )                    | 9006.3±4557.1  | 8874.9±4187.0  | 0.654  |
| Creatinine (mg/dL)                         | 1.6±1.5        | 1.6±1.7        | 0.805  |
| Hemoglobin (g/dL)                          | 11.9±2.2       | 12.0±2.4       | 0.642  |
| NT-proBNP (pg/mL)                          | 9277.4±10566.6 | 9084.5±10293.1 | 0.822  |
| <i>In-hospital management</i>              |                |                |        |
| IV diuretic                                | 209 (69.4%)    | 618 (73.3%)    | 0.225  |
| IV inotrope                                | 70 (23.3%)     | 195 (23.1%)    | >0.999 |
| Mechanical ventilation                     | 24 (8.0%)      | 101 (12.0%)    | 0.071  |
| Transfusion                                | 11 (3.7%)      | 187 (22.2%)    | <0.001 |
| ICU admission                              | 112 (37.2%)    | 431 (51.1%)    | <0.001 |
| Length of stay (days)                      | 9.0 (6.0–15.5) | 9.0 (6.0–14.0) | 0.523  |
| <i>Medications at discharge</i>            |                |                |        |

|                                  |             |             |        |
|----------------------------------|-------------|-------------|--------|
| Beta-blocker                     | 135 (44.9%) | 485 (57.5%) | <0.001 |
| Renin angiotensin system blocker | 163 (54.2%) | 574 (68.1%) | <0.001 |
| Aldosterone antagonist           | 87 (28.9%)  | 346 (41.0%) | <0.001 |
| Loop diuretic                    | 158 (52.5%) | 740 (87.8%) | <0.001 |
| <i>Outcomes</i>                  |             |             |        |
| All-cause mortality              | 81 (26.9%)  | 273 (32.4%) | 0.091  |

Values are mean  $\pm$  SD, median (Q1-Q3), or n (%).

ICU = intensive care unit; IPW = inverse probability weighted; IV = intra-venous; NYHA = New York Heart Association; PS = propensity score; WBC = white blood cell

**Figure S1. Comparison of All-cause Mortality at 3 Years According to Use of Guideline Directed Medical Therapy Among Patients with Heart Failure with Preserved Ejection Fraction.**

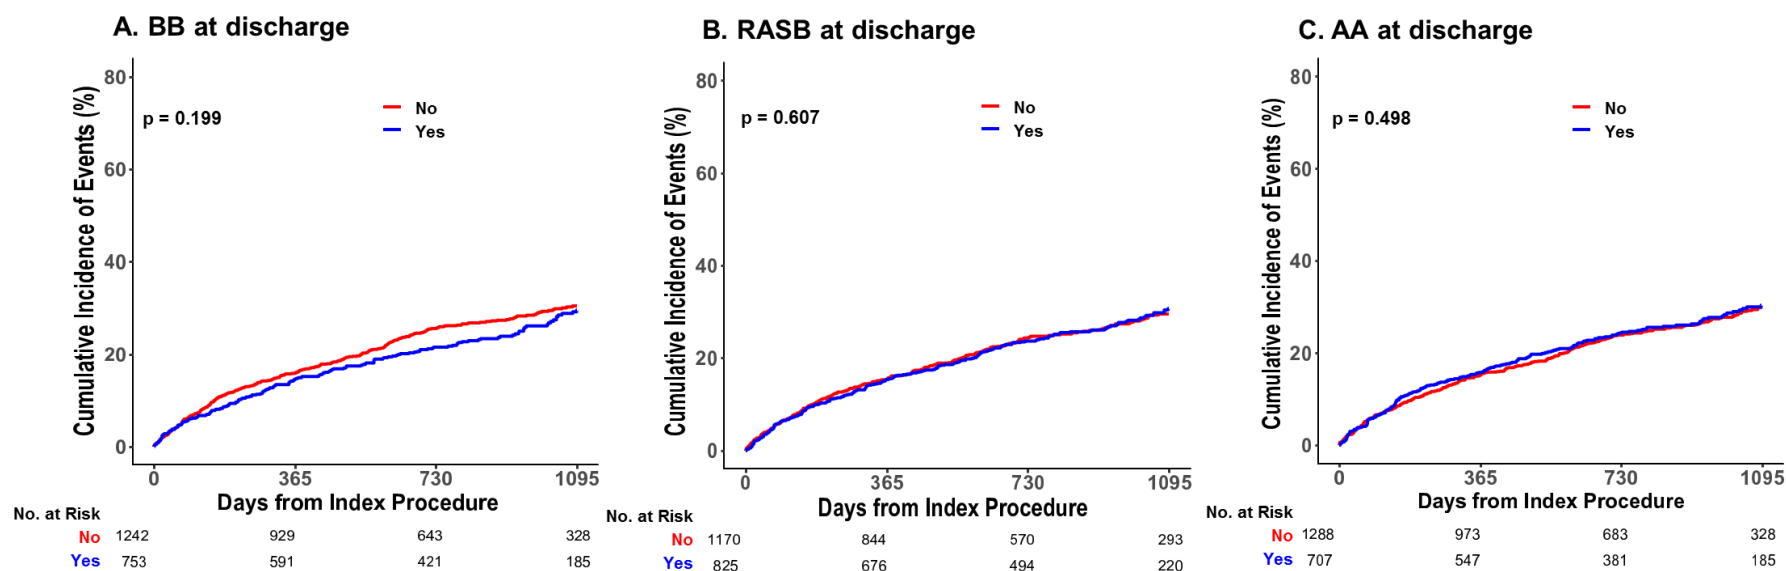

Kaplan-Meier curves for all-cause mortality of AHF patients with HFpEF according to use of BB (blue line) or no BB (red line) (A), use of RASB (blue line) or no RASB (red line) (B), and use of AA (blue line) or no AA (red line) (C) are presented.

AA= aldosterone antagonist; BB= beta-blocker; HFpEF= heart failure with preserved ejection fraction; RASB= renin angiotensin system blocker

**Figure S2. Comparison of All-cause Mortality at 3 Years According to Use of Guideline Directed Medical Therapy Among Patients with Heart Failure with Reduced Ejection Fraction.**

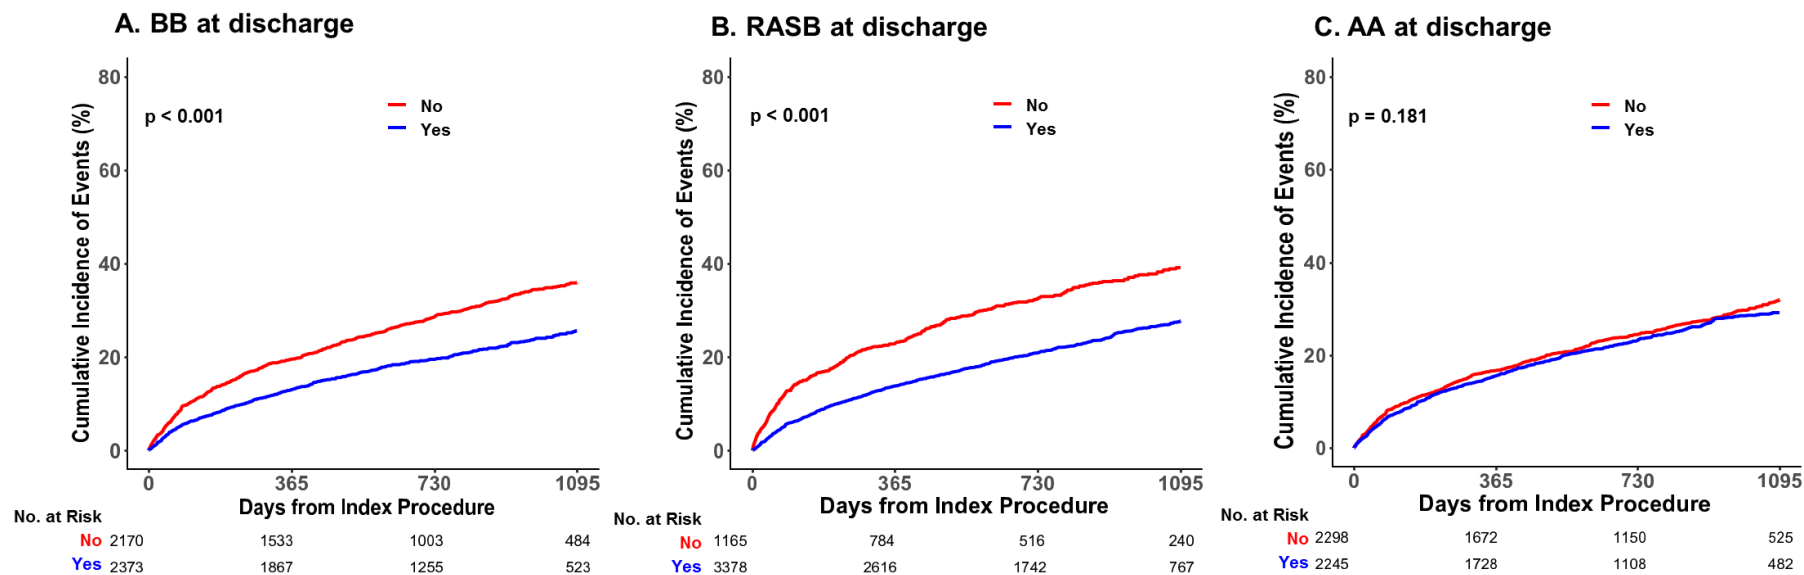

Kaplan-Meier curves for all-cause mortality of AHF patients with HFrEF according to use of BB (blue line) or no BB (red line) (A), use of RASB (blue line) or no RASB (red line) (B), and use of AA (blue line) or no AA (red line) (C) are presented.

AA= aldosterone antagonist; AHF = acute heart failure; BB= beta-blocker; HFrEF= heart failure with reduced ejection fraction; RASB= renin angiotensin system blocker



**Figure S3. Comparison of All-cause Mortality at 3 Years According to Use of Digoxin and Nitrate Among Patients with Heart Failure with Mid-Range Ejection Fraction.**

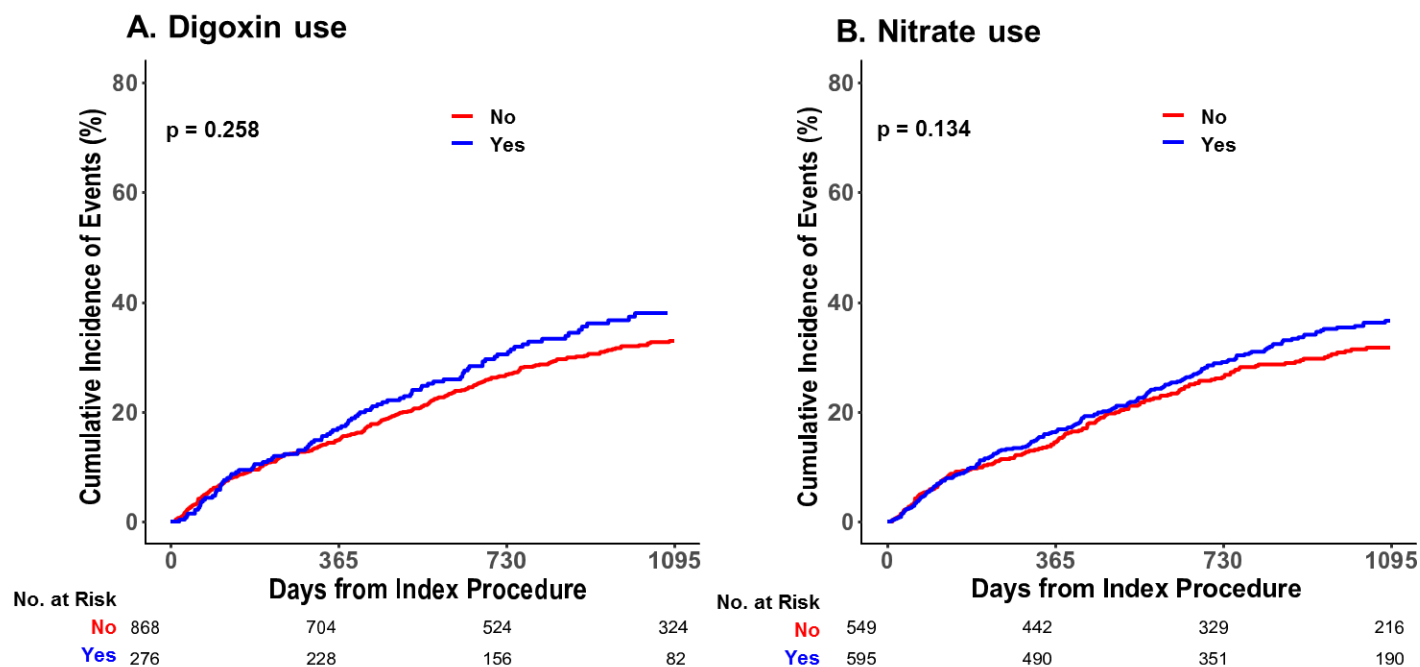

Kaplan-Meier curves for all-cause mortality of AHF patients with HFmrEF according to use of digoxin (blue line) or no digoxin (red line) (A), and use of nitrates (blue line) or no nitrates (red line) (B) are presented.

AA= aldosterone antagonist; AHF = acute heart failure; BB= beta-blocker; HFpEF= heart failure with preserved ejection fraction; RASB= renin angiotensin system blocker
